# Supplementary material for: Structural evolution, sequential oxidation and chemical bonding in tri-yttrium oxide clusters: Y3Ox− and Y3Ox (x = 0–6)
Source: Royal Society of Chemistry journal article supplement (doi:10.1039/c4ra09202c), 2014-01-01
Supplement: c4ra09202c1.pdf [file c4ra09202c1.pdf]

## Supporting Information

### Structural Evolution, Sequential Oxidation and Chemical Bonding in Tri-yttrium Oxide Clusters: $Y_3O_x^-$ and $Y_3O_x$ ( $x = 0-6$ )

Lei Xu<sup>a</sup>, Chan-Juan Xia<sup>a</sup>, Ling-Fei Wang<sup>a</sup>, Shu-Juan Lin<sup>a</sup>, Lu Xie<sup>a</sup>, Bin Wang<sup>a</sup>,  
Yong-Fan Zhang<sup>a,b\*</sup>, Xin Huang<sup>a,b\*</sup>

<sup>a</sup>College of Chemistry, Fuzhou University, Fuzhou, Fujian 350108, PR China

<sup>b</sup>Fujian Provincial Key Laboratory of Theoretical and Computational Chemistry, Xiamen, Fujian  
361005, PR China

\*Corresponding author. Tel.: +86 591 22866139; fax: +86 591 22866156.

E-mail address: [zhangyf@fzu.edu.cn](mailto:zhangyf@fzu.edu.cn) (Y. -F. Zhang); [xhuang@fzu.edu.cn](mailto:xhuang@fzu.edu.cn) (X. Huang)

**Figure S1-S7** Isomeric structures and their relative energies 0.40 eV above the ground state for  $Y_3O_x^{-/0}$  ( $x = 0-6$ ).

**Figure S8** The simulated photoelectron spectra for  $Y_3O_x^-$  ( $x = 0-5$ ) selected low-lying structures except for the ground state (within ~0.10 eV). The simulations are done by fitting the distribution of calculated vertical detachment energies with unit-area Gaussian functions of 0.10 eV width.

**Table SI** Relative energies of the low-lying states of the  $Y_3O_x^{-/0}$  ( $x = 0-2$ ) clusters at the BP86 level (within 0.20 eV), and comparisons with those from the CCSD(T) single-point calculations (with 0.20 eV) at the BP86 geometries.

**Table SII** Cartesian coordinates for the all optimized structures within 0.40 eV for  $Y_3O_x^{-/0}$  ( $x = 0-5$ ) at the BP86/Y/Stuttgart+2f1g/O/aug-cc-pvTZ level of theory.

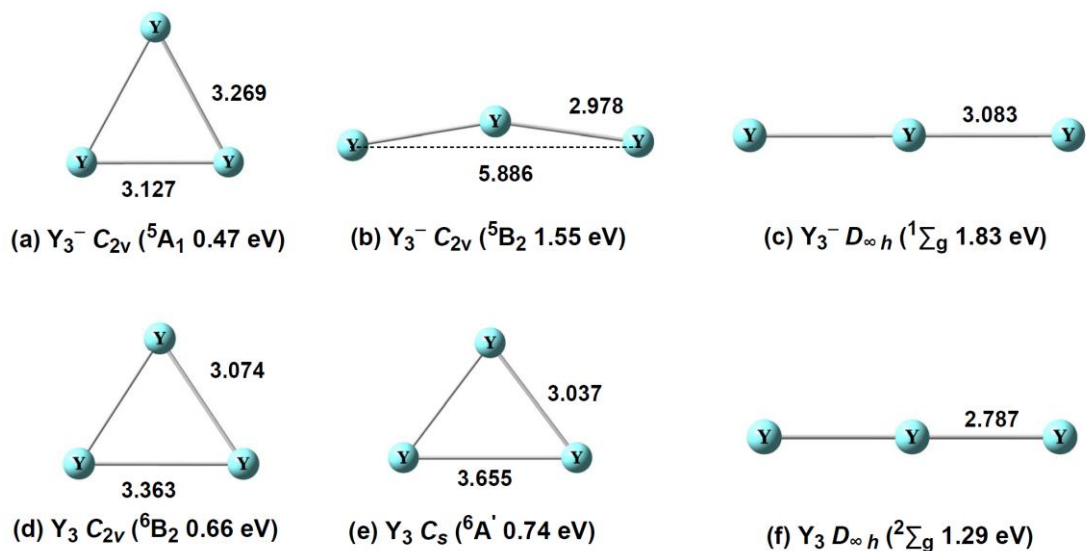

**Figure S1** Isomeric structures and their relative energies for  $Y_3^{-/0}$ .

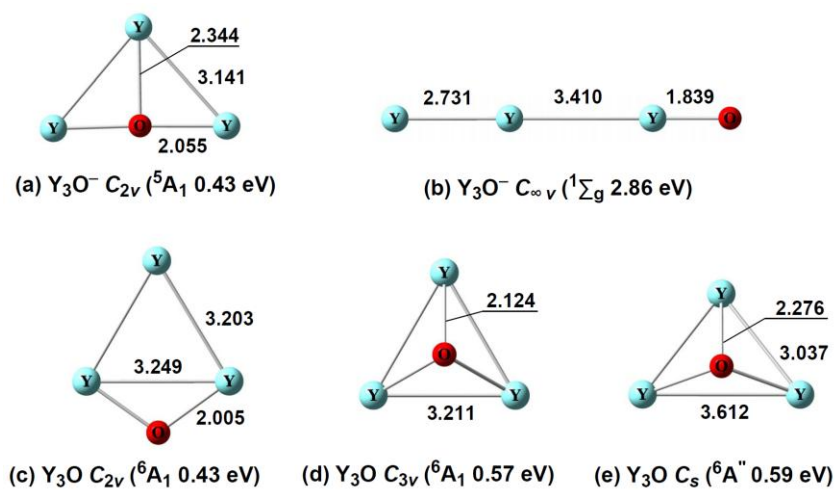

**Figure S2** Isomeric structures and their relative energies for  $Y_3O^{-/0}$ .

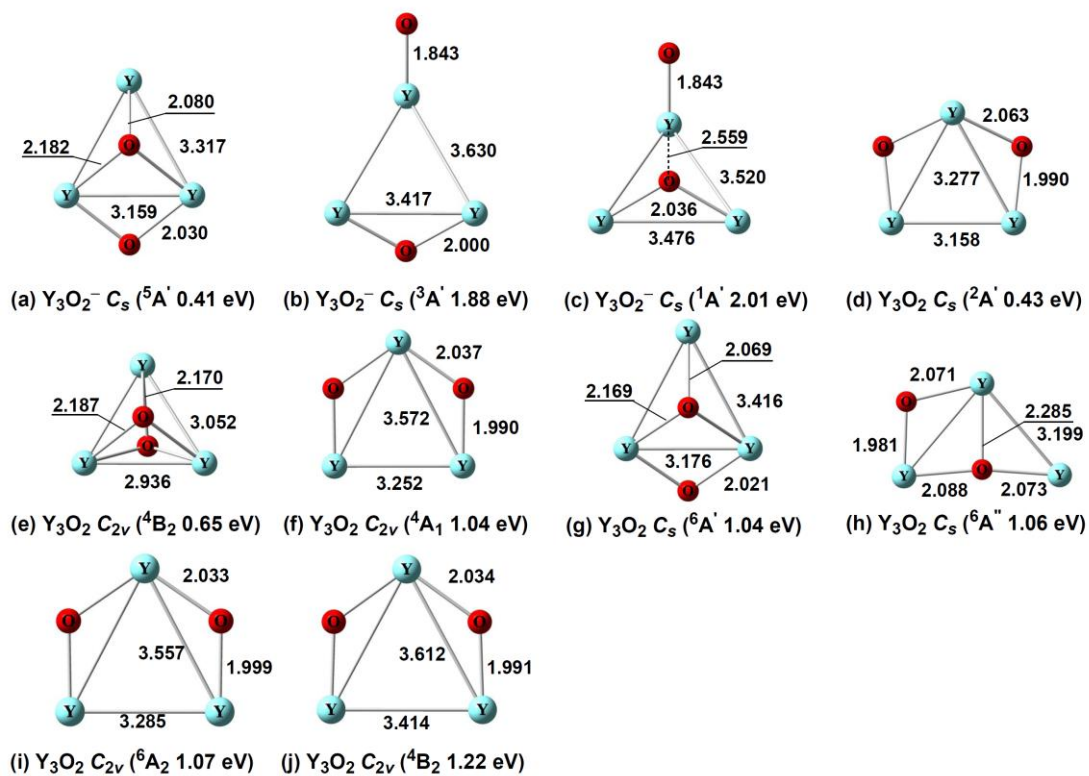

**Figure S3** Isomeric structures and their relative energies for  $Y_3O_2^{-/0}$ .

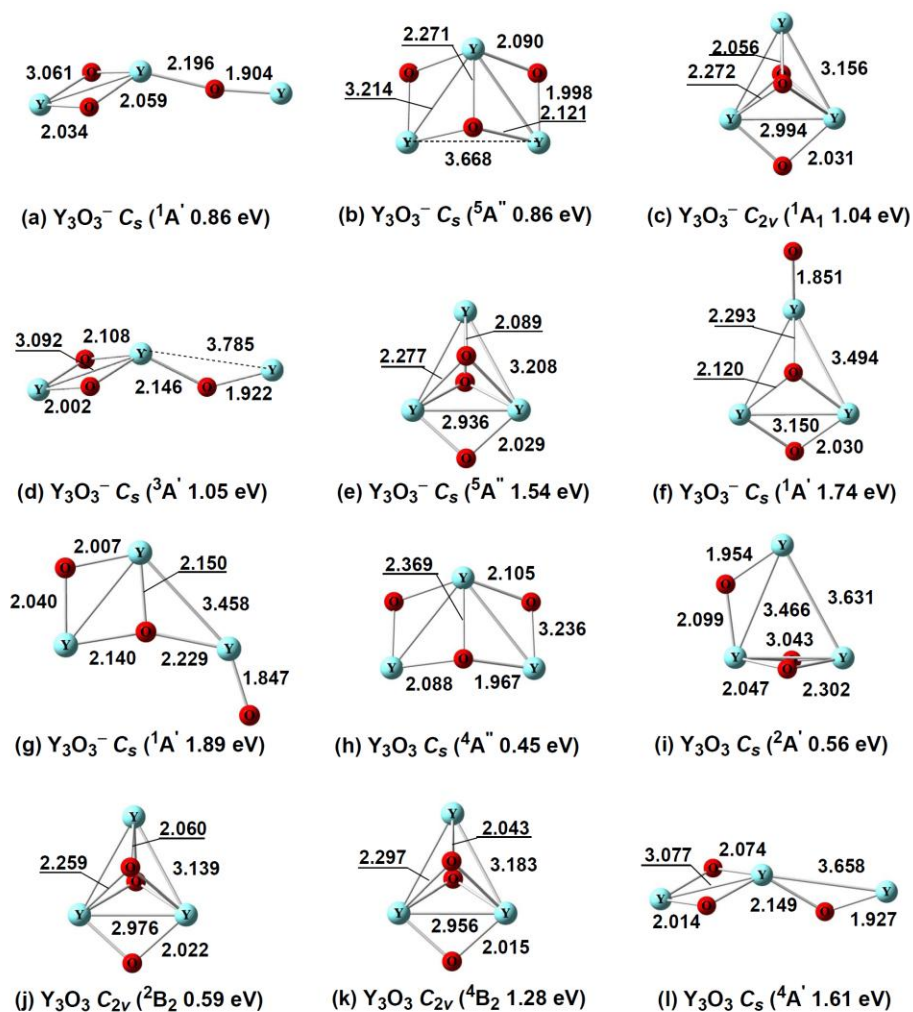

**Figure S4** Isomeric structures and their relative energies for  $\text{Y}_3\text{O}_3^{-/0}$ .

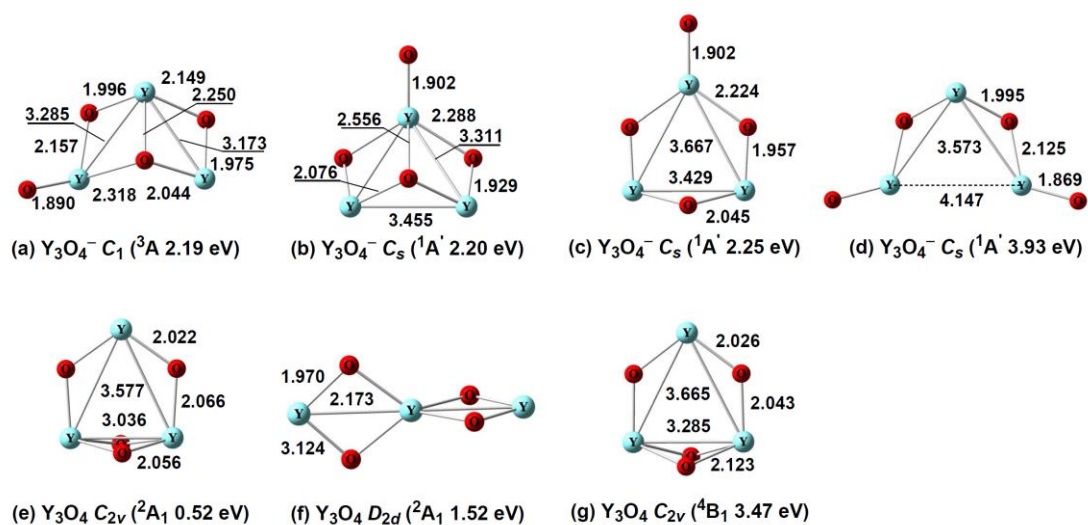

**Figure S5** Isomeric structures and their relative energies for  $\text{Y}_3\text{O}_4^{-/0}$ .

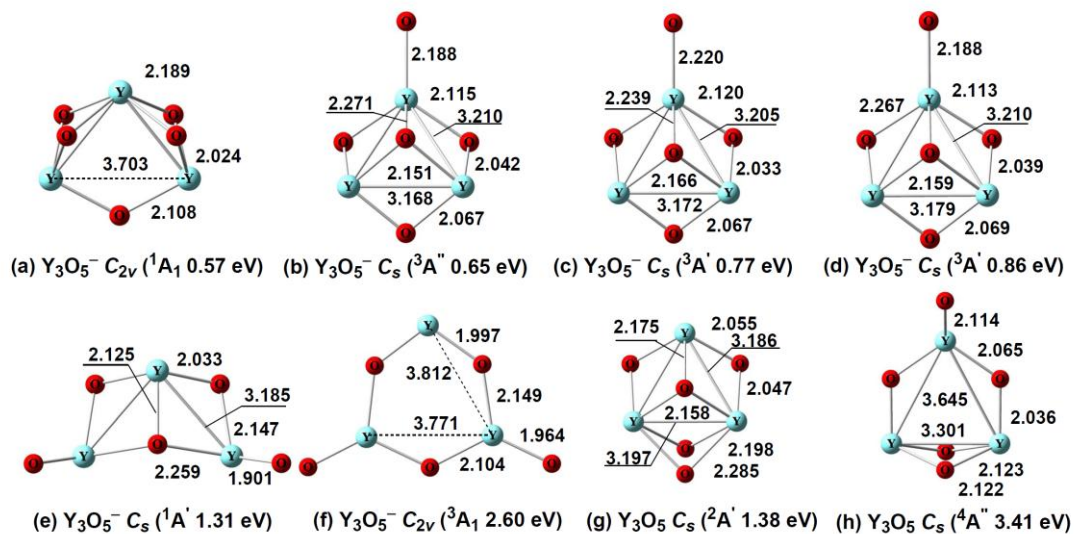

**Figure S6** Isomeric structures and their relative energies for  $\text{Y}_3\text{O}_5^{-/0}$ .

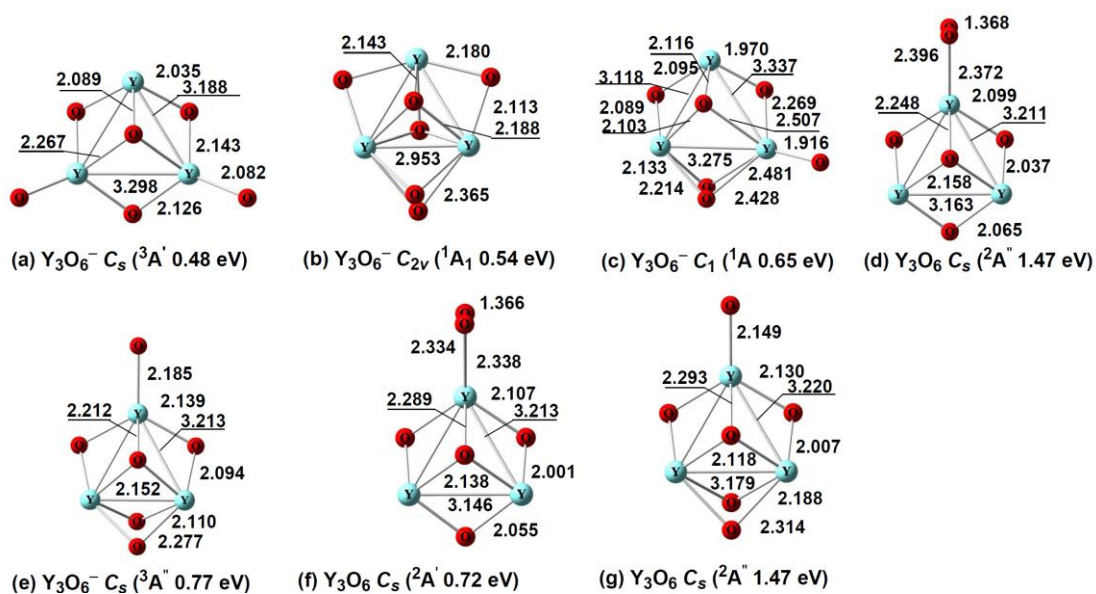

**Figure S7** Isomeric structures and their relative energies for  $\text{Y}_3\text{O}_6^{-/0}$ .

**Figure S8**

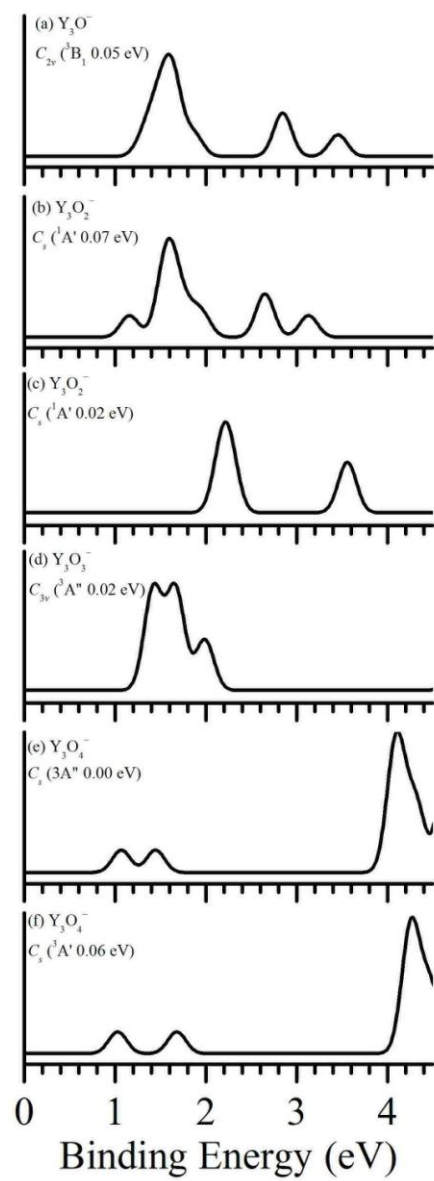

**Table SI** Relative energies of the low-lying states of the  $Y_3O_x^{-/0}$  ( $x = 0-2$ ) clusters at the BP86 level (within 0.20 eV), and comparisons with those from the CCSD(T) single-point calculations(with  $\sim 0.20$  eV) at the BP86 geometries.

| Cluster    | Symmetry | State     | BP86 <sup>a,b</sup> | CCSD(T) <sup>a,c</sup>   |
|------------|----------|-----------|---------------------|--------------------------|
| $Y_3$      | $D_{3h}$ | $^2A_1'$  | 0.00                | 0.00                     |
|            | $D_{3h}$ | $^2A_2''$ | 0.10                | 0.08                     |
| $Y_3O^-$   | $C_{3v}$ | $^1A_1$   | 0.00                | 0.00 (0.00) <sup>d</sup> |
|            | $C_{2v}$ | $^3B_1$   | 0.05                | 0.00 (0.02) <sup>d</sup> |
|            | $C_s$    | $^3A''$   | 0.07                | 0.10 (0.10) <sup>d</sup> |
| $Y_3O_2^-$ | $C_s$    | $^1A'$    | 0.00                | 0.00                     |
|            | $C_s$    | $^1A'$    | 0.02                | 0.24                     |
|            | $C_s$    | $^3A''$   | 0.18                | 0.55                     |
| $Y_3O_2$   | $C_s$    | $^3A'$    | 0.20                | 0.57                     |
|            | $C_s$    | $^2A'$    | 0.00                | 0.00                     |
|            | $C_{2v}$ | $^4A_2$   | 0.06                | 0.31                     |
|            | $C_s$    | $^4A''$   | 0.16                | 0.48                     |
| $Y_3O_3^-$ | $C_s$    | $^3A''$   | 0.00                | 0.00                     |
|            | $C_{3v}$ | $^1A_1$   | 0.02                | 0.18                     |
| $Y_3O_3$   | $C_s$    | $^2A''$   | 0.00                | 0.00                     |
|            | $C_s$    | $^2A'$    | 0.04                | 0.15                     |
|            | $C_{3v}$ | $^1A_1$   | 0.00                | 0.00                     |
| $Y_3O_4^-$ | $C_s$    | $^3A''$   | 0.00                | 0.18                     |
|            | $C_s$    | $^3A'$    | 0.06                | 0.25                     |
| $Y_3O_5$   | $C_s$    | $^2A''$   | 0.00                | 0.00                     |
|            | $C_s$    | $^2A'$    | 0.11                | 0.31                     |
| $Y_3O_6^-$ | $C_s$    | $^1A'$    | 0.00                | 0.00                     |
|            | $C_s$    | $^3A''$   | 0.06                | 0.60                     |

<sup>a</sup> All energies are in eV.

<sup>b</sup> At the BP86/Y/Stuttgart+2f1g/O/aug-cc-pVTZ level.

<sup>c</sup> Single point CCSD(T) energy using BP86 results within 0.20 eV .

<sup>d</sup> CCSD(T) optimization calculations of  $Y_3O^-$

**Table S II.** Cartesian coordinates for the all optimized structures within 0.40 eV for  $Y_3O_x^{-0}$  ( $x = 0-5$ ) at the BP86/Y/Stuttgart+2f1g/O/aug-cc-pvTZ level of theory.

**Cartesian coordinates (Å) of alternative  $Y_3O_x^{-0}$  structures**

|                                                                 | x         | y         | z         |                                                                | x         | y         | z         |
|-----------------------------------------------------------------|-----------|-----------|-----------|----------------------------------------------------------------|-----------|-----------|-----------|
| <b><math>Y_3^- D_{3h}</math> (<math>^1A_1'</math> 0.00 eV)</b>  |           |           |           | <b><math>Y_3 D_{3h}</math> (<math>^2A_2''</math> 0.10 eV)</b>  |           |           |           |
| Y                                                               | 0.000000  | 1.786178  | 0.000000  | Y                                                              | 0.000000  | 1.833747  | 0.000000  |
| Y                                                               | 1.546876  | -0.893089 | 0.000000  | Y                                                              | -1.588072 | -0.916874 | 0.000000  |
| Y                                                               | -1.546876 | -0.893089 | 0.000000  | Y                                                              | 1.588072  | -0.916874 | 0.000000  |
| <b><math>Y_3^- D_{3h}</math> (<math>^3A_2''</math> 0.27 eV)</b> |           |           |           | <b><math>Y_3 D_{3h}</math> (<math>^4A_2''</math> 0.27 eV)</b>  |           |           |           |
| Y                                                               | 0.000000  | 1.822350  | 0.000000  | Y                                                              | 0.000000  | 1.609661  | -0.929349 |
| Y                                                               | 1.578201  | -0.911175 | 0.000000  | Y                                                              | 0.000000  | 0.000000  | 1.858698  |
| Y                                                               | -1.578201 | -0.911175 | 0.000000  | Y                                                              | 0.000000  | -1.609661 | -0.929349 |
| <b><math>Y_3^- D_{3h}</math> (<math>^3A_1'</math> 0.34 eV)</b>  |           |           |           | <b><math>Y_3 C_{2v}</math> (<math>^4B_2</math> 0.31 eV)</b>    |           |           |           |
| Y                                                               | 0.000000  | 1.817161  | 0.000000  | Y                                                              | 0.000000  | 0.000000  | 1.798438  |
| Y                                                               | 1.573708  | -0.908581 | 0.000000  | Y                                                              | 0.000000  | 1.676402  | -0.899219 |
| Y                                                               | -1.573708 | -0.908581 | 0.000000  | Y                                                              | 0.000000  | -1.676402 | -0.899219 |
| <b><math>Y_3^- C_{2v}</math> (<math>^3A_2</math> 0.34 eV)</b>   |           |           |           | <b><math>Y_3O^- C_{3v}</math> (<math>^1A_1</math> 0.00 eV)</b> |           |           |           |
| Y                                                               | 0.000000  | 0.000000  | 1.781257  | Y                                                              | 0.000000  | 1.813827  | -0.074687 |
| Y                                                               | 0.000000  | 1.623013  | -0.890629 | Y                                                              | -1.570820 | -0.906913 | -0.074687 |
| Y                                                               | 0.000000  | -1.623013 | -0.890629 | Y                                                              | 1.570820  | -0.906913 | -0.074687 |
|                                                                 |           |           |           | O                                                              | 0.000000  | 0.000000  | 1.092303  |
| <b><math>Y_3 D_{3h}</math> (<math>^2A_1'</math> 0.00 eV)</b>    |           |           |           | <b><math>Y_3O^- C_{2v}</math> (<math>^3B_1</math> 0.05 eV)</b> |           |           |           |
| Y                                                               | 0.000000  | 1.824507  | 0.000000  | Y                                                              | 0.000000  | 1.648543  | -0.846583 |
| Y                                                               | -1.580070 | -0.912254 | 0.000000  | Y                                                              | 0.000000  | 0.000000  | 2.099996  |
| Y                                                               | 1.580070  | -0.912254 | 0.000000  | Y                                                              | 0.000000  | -1.648543 | -0.846583 |



|                                                                                      |           |           |           |                                                                                       |           |           |           |
|--------------------------------------------------------------------------------------|-----------|-----------|-----------|---------------------------------------------------------------------------------------|-----------|-----------|-----------|
| O                                                                                    | 0.000000  | 0.000000  | -1.983300 | O                                                                                     | 0.620416  | 0.701953  | 0.000000  |
| <b>Y<sub>3</sub>O<sup>-</sup> C<sub>s</sub> (<sup>3</sup>A'' 0.07 eV)</b>            |           |           |           | <b>Y<sub>3</sub>O C<sub>3v</sub> (<sup>2</sup>A<sub>1</sub> 0.00 eV)</b>              |           |           |           |
| Y                                                                                    | 0.661710  | -0.625445 | 1.698788  | Y                                                                                     | 0.000000  | 1.849328  | -0.069078 |
| Y                                                                                    | -1.459156 | 1.120718  | 0.000000  | Y                                                                                     | -1.601565 | -0.924664 | -0.069078 |
| Y                                                                                    | 0.661710  | -0.625445 | -1.698788 | Y                                                                                     | 1.601565  | -0.924664 | -0.069078 |
| O                                                                                    | 0.661710  | 0.634590  | 0.000000  | O                                                                                     | 0.000000  | 0.000000  | 1.010261  |
| <b>Y<sub>3</sub>O<sup>-</sup> C<sub>2v</sub> (<sup>1</sup>A<sub>1</sub> 0.22 eV)</b> |           |           |           | <b>Y<sub>3</sub>O C<sub>2v</sub> (<sup>4</sup>B<sub>1</sub> 0.25 eV)</b>              |           |           |           |
| Y                                                                                    | 0.000000  | 0.000000  | 2.067547  | Y                                                                                     | 0.000000  | 1.676426  | -0.819033 |
| Y                                                                                    | 0.000000  | 1.604544  | -0.825742 | Y                                                                                     | 0.000000  | -1.676426 | -0.819033 |
| Y                                                                                    | 0.000000  | -1.604544 | -0.825742 | Y                                                                                     | 0.000000  | 0.000000  | 2.028467  |
| O                                                                                    | 0.000000  | 0.000000  | -2.028311 | O                                                                                     | 0.000000  | 0.000000  | -1.903203 |
| <b>Y<sub>3</sub>O<sup>-</sup> C<sub>s</sub> (<sup>3</sup>A'' 0.24 eV)</b>            |           |           |           | <b>Y<sub>3</sub>O<sub>2</sub><sup>-</sup> C<sub>s</sub> (<sup>1</sup>A' 0.00 eV)</b>  |           |           |           |
| Y                                                                                    | 2.024351  | 0.896397  | 0.000000  | Y                                                                                     | 1.310771  | 1.803693  | 0.000000  |
| Y                                                                                    | -2.062448 | 0.739885  | 0.000000  | Y                                                                                     | -0.555567 | -0.772985 | 1.604636  |
| Y                                                                                    | 0.038097  | -1.740200 | 0.000000  | Y                                                                                     | -0.555567 | -0.772985 | -1.604636 |
| O                                                                                    | 0.000000  | 0.506597  | 0.000000  | O                                                                                     | -0.417665 | 0.736276  | 0.000000  |
| <b>Y<sub>3</sub>O<sup>-</sup> C<sub>3v</sub> (<sup>3</sup>A<sub>1</sub> 0.31 eV)</b> |           |           |           | <b>Y<sub>3</sub>O<sub>2</sub><sup>-</sup> C<sub>s</sub> (<sup>1</sup>A' 0.02 eV)</b>  |           |           |           |
| Y                                                                                    | 0.000000  | 2.027291  | -0.036423 | Y                                                                                     | 0.259662  | -1.051956 | 1.901018  |
| Y                                                                                    | 1.755686  | -1.013646 | -0.036423 | Y                                                                                     | -0.625853 | 1.735842  | 0.000000  |
| Y                                                                                    | -1.755686 | -1.013646 | -0.036423 | Y                                                                                     | 0.259662  | -1.051956 | -1.901018 |
| O                                                                                    | 0.000000  | 0.000000  | 0.532682  | O                                                                                     | 0.259662  | 0.897169  | 1.658909  |
| <b>Y<sub>3</sub>O<sup>-</sup> C<sub>s</sub> (<sup>5</sup>A' 0.40 eV)</b>             |           |           |           | <b>Y<sub>3</sub>O<sub>2</sub><sup>-</sup> C<sub>s</sub> (<sup>3</sup>A'' 0.18 eV)</b> |           |           |           |
| Y                                                                                    | 0.620416  | -0.775737 | 1.551672  | Y                                                                                     | 2.101716  | 0.192932  | 0.000000  |
| Y                                                                                    | 0.620416  | -0.775737 | -1.551672 |                                                                                       |           |           |           |
| Y                                                                                    | -1.368096 | 1.407483  | 0.000000  |                                                                                       |           |           |           |

Y -1.806281 1.571250 0.000000

Y -0.587591 -1.539685 0.000000

O 1.424263 -1.711537 0.000000

O 0.000000 0.617114 0.000000

**$Y_3O_2^- C_s (^3A' 0.20 \text{ eV})$**

Y 2.071275 -0.023580 0.000000

Y -1.603314 1.831635 0.000000

Y -0.728121 -1.536256 0.000000

O 1.268281 -1.872231 0.000000

O 0.000000 0.547210 0.000000

**$Y_3O_2^- C_{2v} (^3A_2 0.21 \text{ eV})$**

Y 0.000000 0.000000 1.909343

Y 0.000000 1.706021 -1.127623

Y 0.000000 -1.706021 -1.127623

O 0.000000 1.773127 0.843142

O 0.000000 -1.773127 0.843142

**$Y_3O_2^- C_2 (^1A 0.32 \text{ eV})$**

Y 0.000000 3.363850 -0.565371

Y 0.000000 0.000000 1.085947

Y 0.000000 -3.363850 -0.565371

O 0.709283 1.695045 0.109186

O -0.709283 -1.695045 0.109186

**$Y_3O_2^- C_s (^5A'' 0.34 \text{ eV})$**

Y -0.360933 1.792091 0.000000

Y 0.149749 -1.081683 1.682866

Y 0.149749 -1.081683 -1.682866

O 0.149749 0.904985 1.798290

O 0.149749 0.904985 -1.798290

**$Y_3O_2 C_s (^2A' 0.00 \text{ eV})$**

Y -1.353520 1.581258 0.000000

Y 0.557037 -0.679316 1.598143

Y 0.557037 -0.679316 -1.598143

O 0.557037 0.816209 0.000000

O 0.610262 -1.901508 0.000000

**$Y_3O_2 C_{2v} (^4A_2 0.06 \text{ eV})$**

Y 0.000000 0.000000 1.994770

Y 0.000000 1.720539 -1.164028

Y 0.000000 -1.720539 -1.164028

O 0.000000 1.657869 0.812384

O 0.000000 -1.657869 0.812384

**$Y_3O_2 C_s (^4A'' 0.16 \text{ eV})$**

Y 0.538767 -0.685123 1.577992

Y -1.371205 1.588778 0.000000

Y 0.538767 -0.685123 -1.577992

O 0.892882 -1.885980 0.000000

O 0.538767 0.820638 0.000000

|                                                                                                  |           |           |           |           |           |           |
|--------------------------------------------------------------------------------------------------|-----------|-----------|-----------|-----------|-----------|-----------|
|                                                                                                  |           |           | O         | 0.275088  | 1.145059  | 1.869708  |
|                                                                                                  |           |           | O         | 0.275088  | 1.145059  | -1.869708 |
|                                                                                                  |           |           | O         | -0.344158 | -0.795434 | 0.000000  |
| <b>Y<sub>3</sub>O<sub>2</sub> C<sub>2</sub> (<sup>2</sup>A 0.39 eV)</b>                          |           |           |           |           |           |           |
| Y                                                                                                | 0.000000  | 3.323519  | -0.548276 |           |           |           |
| Y                                                                                                | 0.000000  | 0.000000  | 1.085004  |           |           |           |
| Y                                                                                                | 0.000000  | -3.323519 | -0.548276 |           |           |           |
| O                                                                                                | 0.704516  | 1.606148  | 0.028150  |           |           |           |
| O                                                                                                | -0.704516 | -1.606148 | 0.028150  |           |           |           |
| <b>Y<sub>3</sub>O<sub>3</sub> C<sub>s</sub> (<sup>2</sup>A'' 0.00 eV)</b>                        |           |           |           |           |           |           |
| Y                                                                                                | 0.654949  | 1.502425  | 0.000000  |           |           |           |
| Y                                                                                                | -0.339301 | -0.906956 | 1.792618  |           |           |           |
| Y                                                                                                | -0.339301 | -0.906956 | -1.792618 |           |           |           |
| O                                                                                                | -0.339301 | 1.096462  | 1.749817  |           |           |           |
| O                                                                                                | -0.339301 | 1.096462  | -1.749817 |           |           |           |
| O                                                                                                | 0.793909  | -0.674428 | 0.000000  |           |           |           |
| <b>Y<sub>3</sub>O<sub>3</sub><sup>-</sup> C<sub>s</sub> (<sup>3</sup>A'' 0.00 eV)</b>            |           |           |           |           |           |           |
| Y                                                                                                | -0.670489 | 1.555409  | 0.000000  |           |           |           |
| Y                                                                                                | 0.347085  | -0.924307 | 1.760216  |           |           |           |
| Y                                                                                                | 0.347085  | -0.924307 | -1.760216 |           |           |           |
| O                                                                                                | 0.347085  | 1.069300  | 1.756912  |           |           |           |
| O                                                                                                | 0.347085  | 1.069300  | -1.756912 |           |           |           |
| O                                                                                                | -0.809620 | -0.709221 | 0.000000  |           |           |           |
| <b>Y<sub>3</sub>O<sub>3</sub><sup>-</sup> C<sub>3v</sub> (<sup>1</sup>A<sub>1</sub> 0.02 eV)</b> |           |           |           |           |           |           |
| Y                                                                                                | 0.000000  | 2.057113  | -0.068388 |           |           |           |
| Y                                                                                                | 1.781512  | -1.028556 | -0.068388 |           |           |           |
| Y                                                                                                | -1.781512 | -1.028556 | -0.068388 |           |           |           |
| O                                                                                                | 1.659708  | 0.958233  | 0.333393  |           |           |           |
| O                                                                                                | -1.659708 | 0.958233  | 0.333393  |           |           |           |
| O                                                                                                | 0.000000  | -1.916466 | 0.333393  |           |           |           |
| <b>Y<sub>3</sub>O<sub>3</sub> C<sub>s</sub> (<sup>2</sup>A' 0.04 eV)</b>                         |           |           |           |           |           |           |
| Y                                                                                                | 0.007261  | -1.078110 | 1.637314  |           |           |           |
| Y                                                                                                | 0.007261  | -1.078110 | -1.637314 |           |           |           |
| Y                                                                                                | -0.225753 | 2.121292  | 0.000000  |           |           |           |
| O                                                                                                | 1.015226  | -1.710176 | 0.000000  |           |           |           |
| O                                                                                                | 0.007261  | 0.940224  | 1.635146  |           |           |           |
| O                                                                                                | 0.007261  | 0.940224  | -1.635146 |           |           |           |
| <b>Y<sub>3</sub>O<sub>3</sub><sup>-</sup> C<sub>s</sub> (<sup>1</sup>A' 0.32 eV)</b>             |           |           |           |           |           |           |
| Y                                                                                                | -0.592436 | 1.398985  | 0.000000  |           |           |           |
| Y                                                                                                | 0.275088  | -0.852794 | 2.041935  |           |           |           |
| Y                                                                                                | 0.275088  | -0.852794 | -2.041935 |           |           |           |
| <b>Y<sub>3</sub>O<sub>3</sub> C<sub>s</sub> (<sup>2</sup>A' 0.12 eV)</b>                         |           |           |           |           |           |           |
| Y                                                                                                | 0.660719  | 1.604865  | 0.000000  |           |           |           |
| Y                                                                                                | -0.350451 | -0.941552 | 1.666743  |           |           |           |
| Y                                                                                                | -0.350451 | -0.941552 | -1.666743 |           |           |           |

|   |           |           |           |
|---|-----------|-----------|-----------|
| O | -0.350451 | 1.027043  | 1.740841  |
| O | -0.350451 | 1.027043  | -1.740841 |
| O | 0.896793  | -0.697673 | 0.000000  |

**Y<sub>3</sub>O<sub>3</sub> D<sub>3h</sub> (<sup>4</sup>A<sub>1</sub>' 0.16 eV)**

|   |           |           |          |
|---|-----------|-----------|----------|
| Y | 1.861824  | 1.074924  | 0.000000 |
| Y | -1.861824 | 1.074924  | 0.000000 |
| Y | 0.000000  | -2.149849 | 0.000000 |
| O | 0.000000  | 1.868794  | 0.000000 |
| O | 1.618423  | -0.934397 | 0.000000 |
| O | -1.618423 | -0.934397 | 0.000000 |

**Y<sub>3</sub>O<sub>4</sub><sup>-</sup> C<sub>s</sub> (<sup>3</sup>A' 0.06 eV)**

|   |           |           |           |
|---|-----------|-----------|-----------|
| Y | -0.301542 | -0.875932 | 1.581499  |
| Y | -0.301542 | -0.875932 | -1.581499 |
| Y | 0.802439  | 1.679986  | 0.000000  |
| O | -1.493390 | -1.452438 | 0.000000  |
| O | -0.301542 | 1.165409  | 1.682103  |
| O | -0.301542 | 1.165409  | -1.682103 |
| O | 1.124616  | -0.527972 | 0.000000  |

**Y<sub>3</sub>O<sub>4</sub><sup>-</sup> C<sub>3v</sub> (<sup>1</sup>A<sub>1</sub> 0.00 eV)**

|   |           |           |           |
|---|-----------|-----------|-----------|
| Y | 0.000000  | 1.836211  | 0.071317  |
| Y | 1.590206  | -0.918106 | 0.071317  |
| Y | -1.590206 | -0.918106 | 0.071317  |
| O | 0.000000  | 0.000000  | 1.236168  |
| O | 1.672297  | 0.965501  | -0.759728 |
| O | -1.672297 | 0.965501  | -0.759728 |
| O | 0.000000  | -1.931002 | -0.759728 |

**Y<sub>3</sub>O<sub>4</sub> C<sub>3v</sub> (<sup>2</sup>A<sub>1</sub> 0.00 eV)**

|   |           |           |           |
|---|-----------|-----------|-----------|
| Y | 0.000000  | 1.832621  | 0.068639  |
| Y | -1.587097 | -0.916311 | 0.068639  |
| Y | 1.587097  | -0.916311 | 0.068639  |
| O | -1.664655 | 0.961089  | -0.747240 |
| O | 1.664655  | 0.961089  | -0.747240 |
| O | 0.000000  | -1.922178 | -0.747240 |
| O | 0.000000  | 0.000000  | 1.237876  |

**Y<sub>3</sub>O<sub>4</sub><sup>-</sup> C<sub>s</sub> (<sup>3</sup>A'' 0.00 eV)**

|   |           |           |           |
|---|-----------|-----------|-----------|
| Y | -0.308503 | -0.867287 | 1.599483  |
| Y | -0.308503 | -0.867287 | -1.599483 |
| Y | 0.809550  | 1.646298  | 0.000000  |
| O | -1.461127 | -1.469510 | 0.000000  |
| O | -0.308503 | 1.196568  | 1.666107  |
| O | -0.308503 | 1.196568  | -1.666107 |
| O | 1.139484  | -0.493278 | 0.000000  |

**Y<sub>3</sub>O<sub>5</sub><sup>-</sup> C<sub>s</sub> (<sup>1</sup>A' 0.00 eV)**

|   |           |           |           |
|---|-----------|-----------|-----------|
| Y | 0.700180  | 1.617271  | 0.000000  |
| Y | -0.414421 | -1.042994 | 1.567802  |
| Y | -0.414421 | -1.042994 | -1.567802 |

|   |           |           |           |   |           |           |           |
|---|-----------|-----------|-----------|---|-----------|-----------|-----------|
| O | 0.996362  | -0.850912 | 0.000000  | O | -1.253061 | -0.206738 | 0.000000  |
| O | 2.149324  | 2.886593  | 0.000000  | O | 1.677724  | -0.682444 | 0.000000  |
| O | -1.689613 | -1.573046 | 0.000000  | O | 0.242312  | -2.462883 | 0.000000  |
| O | -0.414421 | 0.911180  | -1.852740 | O | 0.229440  | 1.278202  | 1.745314  |
| O | -0.414421 | 0.911180  | 1.852740  | O | 0.229440  | 1.278202  | -1.745314 |

**Y<sub>3</sub>O<sub>5</sub> C<sub>s</sub> (<sup>2</sup>A' 0.00 eV)**

|   |           |           |           |
|---|-----------|-----------|-----------|
| Y | 0.649603  | 1.553103  | 0.000000  |
| Y | -0.413401 | -1.035704 | 1.576317  |
| Y | -0.413401 | -1.035704 | -1.576317 |
| O | 0.992287  | -0.730349 | 0.000000  |
| O | 2.312744  | 2.924094  | 0.000000  |
| O | -1.614386 | -1.589437 | 0.000000  |
| O | -0.413401 | 0.961215  | -1.739572 |
| O | -0.413401 | 0.961215  | 1.739572  |

**Y<sub>3</sub>O<sub>5</sub> C<sub>s</sub> (<sup>2</sup>A' 0.11 eV)**

|   |           |           |           |
|---|-----------|-----------|-----------|
| Y | 0.686435  | 1.529567  | 0.000000  |
| Y | -0.433297 | -1.024520 | 1.579013  |
| Y | -0.433297 | -1.024520 | -1.579013 |
| O | 0.990778  | -0.719381 | 0.000000  |
| O | 2.378372  | 2.908171  | 0.000000  |
| O | -1.624280 | -1.588585 | 0.000000  |
| O | -0.433297 | 0.966115  | -1.722040 |
| O | -0.433297 | 0.966115  | 1.722040  |

**Y<sub>3</sub>O<sub>5</sub> C<sub>s</sub> (<sup>2</sup>A' 0.21 eV)**

|   |           |           |           |
|---|-----------|-----------|-----------|
| Y | 0.229440  | -0.828589 | 1.505504  |
| Y | 0.229440  | -0.828589 | -1.505504 |
| Y | -0.689824 | 1.820390  | 0.000000  |

**Y<sub>3</sub>O<sub>6</sub><sup>-</sup> C<sub>s</sub> (<sup>1</sup>A' 0.00 eV)**

|   |           |           |           |
|---|-----------|-----------|-----------|
| Y | -0.524508 | -1.196754 | 1.564062  |
| Y | -0.524508 | -1.196754 | -1.564062 |
| Y | 0.592573  | 1.478197  | 0.000000  |
| O | 0.881339  | -1.003940 | 0.000000  |
| O | -1.789194 | -1.733125 | 0.000000  |
| O | -0.524508 | 0.784069  | -1.766059 |
| O | -0.524508 | 0.784069  | 1.766059  |
| O | 1.594976  | 3.372676  | 0.000000  |
| O | 2.587058  | 2.258390  | 0.000000  |

**Y<sub>3</sub>O<sub>6</sub><sup>-</sup> C<sub>s</sub> (<sup>3</sup>A'' 0.06 eV)**

|   |           |           |          |
|---|-----------|-----------|----------|
| Y | -0.520641 | -1.201445 | 1.580775 |
|---|-----------|-----------|----------|

|                                                                                       |           |           |           |                                                                                      |           |                     |
|---------------------------------------------------------------------------------------|-----------|-----------|-----------|--------------------------------------------------------------------------------------|-----------|---------------------|
| Y                                                                                     | -0.520641 | -1.201445 | -1.580775 |                                                                                      |           |                     |
| Y                                                                                     | 0.547363  | 1.385650  | 0.000000  | <b>Y<sub>3</sub>O<sub>6</sub><sup>-</sup> C<sub>s</sub> (<sup>3</sup>A' 0.27 eV)</b> |           |                     |
| O                                                                                     | 0.895462  | -0.871111 | 0.000000  | Y                                                                                    | -0.528871 | -1.194508 1.586401  |
| O                                                                                     | -1.732066 | -1.757450 | 0.000000  | Y                                                                                    | -0.528871 | -1.194508 -1.586401 |
| O                                                                                     | -0.520641 | 0.832809  | -1.729043 | Y                                                                                    | 0.553554  | 1.383383 0.000000   |
| O                                                                                     | -0.520641 | 0.832809  | 1.729043  | O                                                                                    | 0.893566  | -0.870955 0.000000  |
| O                                                                                     | 1.669828  | 3.446335  | 0.000000  | O                                                                                    | -1.729158 | -1.763165 0.000000  |
| O                                                                                     | 2.615918  | 2.475650  | 0.000000  | O                                                                                    | -0.528871 | 0.837924 -1.720352  |
| <b>Y<sub>3</sub>O<sub>6</sub><sup>-</sup> C<sub>s</sub> (<sup>3</sup>A'' 0.19 eV)</b> |           |           |           | O                                                                                    | -0.528871 | 0.837924 1.720352   |
| Y                                                                                     | 0.780430  | 1.834095  | 0.000000  | O                                                                                    | 1.710713  | 3.423499 0.000000   |
| Y                                                                                     | -0.323389 | -0.677103 | 1.626938  | O                                                                                    | 2.640536  | 2.437237 0.000000   |
| Y                                                                                     | -0.323389 | -0.677103 | -1.626938 | <b>Y<sub>3</sub>O<sub>6</sub> C<sub>s</sub> (<sup>3</sup>A' 0.00 eV)</b>             |           |                     |
| O                                                                                     | 1.176140  | -0.225816 | 0.000000  | Y                                                                                    | -0.532736 | -1.181299 1.571681  |
| O                                                                                     | -0.323389 | 1.464818  | 1.666723  | Y                                                                                    | -0.532736 | -1.181299 -1.571681 |
| O                                                                                     | -1.427671 | -1.407292 | 0.000000  | Y                                                                                    | 0.539953  | 1.417378 0.000000   |
| O                                                                                     | -0.323389 | 1.464818  | -1.666723 | O                                                                                    | 0.873411  | -0.891259 0.000000  |
| O                                                                                     | 0.123380  | -1.817993 | 3.430130  | O                                                                                    | -1.738033 | -1.739278 0.000000  |
| O                                                                                     | 0.123380  | -1.817993 | -3.430130 | O                                                                                    | -0.532736 | 0.816939 -1.719932  |
| <b>Y<sub>3</sub>O<sub>6</sub><sup>-</sup> C<sub>s</sub> (<sup>1</sup>A' 0.23 eV)</b>  |           |           |           | O                                                                                    | -0.532736 | 0.816939 1.719932   |
| Y                                                                                     | -0.696686 | -1.720996 | 0.000000  | O                                                                                    | 1.821960  | 3.329629 0.000000   |
| Y                                                                                     | 1.709536  | -0.005412 | 0.000000  | O                                                                                    | 2.670040  | 2.274980 0.000000   |
| Y                                                                                     | -1.057647 | 1.220472  | 0.000000  |                                                                                      |           |                     |
| O                                                                                     | 0.023281  | -0.140833 | 1.338478  |                                                                                      |           |                     |
| O                                                                                     | 1.467678  | -2.073957 | 0.000000  |                                                                                      |           |                     |
| O                                                                                     | 0.023281  | -0.140833 | -1.338478 |                                                                                      |           |                     |
| O                                                                                     | -2.411496 | -0.470432 | 0.000000  |                                                                                      |           |                     |
| O                                                                                     | 0.023281  | 3.173110  | 0.000000  |                                                                                      |           |                     |
| O                                                                                     | 1.092362  | 2.119385  | 0.000000  |                                                                                      |           |                     |
